# Supplementary material for: Changes in Transcriptome of Yersinia pseudotuberculosis IP32953 Grown at 3 and 28°C Detected by RNA Sequencing Shed Light on Cold Adaptation
Source: Front Cell Infect Microbiol. 2018 Nov 27;8:416. doi: 10.3389/fcimb.2018.00416 (PMC6277586; doi:10.3389/fcimb.2018.00416)
Supplement: Supplementary file 1 [file Data_Sheet_1.XLSX]

## Sheet: INFO
SUPPLEMENTARY MATERIAL
Changes in Transcriptome of Yersinia pseudotuberculosis IP32953 Grown at 3°C and 28°C Detected by RNA Sequencing Shed Light on Cold Adaptation
Jussa-Pekka Virtanen, Riikka Keto-Timonen*, Kaisa Jaakkola, Noora Salin, Hannu Korkeala
* Correspondence:
DVM, PhD Riikka Keto-Timonen
riikka.keto-timonen@helsinki.fi
This workbook contains the operons upregulated at least at one growth point between points I-VI, clustered to four subclusters as seen in Fig. 2.
Attributes of different members of an operon are separated by a semicolon. Maximum logFC of the genes of an operon is used.
Field	Explanation
PATRIC id	Gene id from the PATRIC database, Y. pseudotuberculosis IP 32953 (genome ID 273123.14) (https://www.patricbrc.org/view/Genome/273123.14)
KEGG id	Corresponding locus tag (when applicable) from the KEGG database (organism code yps) (http://www.kegg.jp/kegg-bin/show_organism?org=yps)
Gene	Gene symbol from the PATRIC database
Product	Product of the gene from the PATRIC database
Pathway	Pathway to which the gene belongs to (when applicable) from the PATRIC database
I	The log2 fold changes (or maximum logFC of an operon's genes) at each growth point I-VI (see Fig. 1)
II	=		Positive log change means that gene was upregulated at 3°C
III	=
IV	=
V	=
VI	=

## Sheet: Subcluster B
PATRIC id	KEGG id	Gene	Product	Pathway	I (logFC)	II (logFC)	III (logFC)	IV (logFC)	V (logFC)	VI (logFC)
fig|273123.14.peg.835			hypothetical protein		5.19	7.1	8.37	8.7	5.41	0.775
fig|273123.14.peg.3731	yptb3068		Carbonic anhydrase, beta class (EC 4.2.1.1)	Nitrogen metabolism	4.04	2.74	3.77	1.57	-0.412	-0.326
fig|273123.14.peg.3695	yptb3101		Maltodextrin ABC transporter, substrate-binding protein MdxE		3.18	0.956	0.25	0.871	2.15	-0.0674
fig|273123.14.peg.3730			hypothetical protein		3.1	1.98	3.77	1.94	0.258	0.275
fig|273123.14.peg.4053			N-acetylgalactosamine 6-sulfate sulfatase (GALNS)		2.97	0.699	1.28	-1.1	-0.378	-0.779
fig|273123.14.peg.3694			hypothetical protein		2.78	0.793	0.733	1.83	2.2	0.096
fig|273123.14.peg.4345	yptb2508	csy1	CRISPR-associated protein, Csy1 family		2.62	1.73	2.67	1.17	2.12	-0.257
fig|273123.14.peg.4348	yptb2505	cas6f	CRISPR-associated protein, Csy4 family		2.48	0.626	2.74	0.349	1.38	-0.412
fig|273123.14.peg.1572	yptb1061		Putative pertactin family virulence factor/autotransporter precursor		2.36	2.68	2.92	2.32	1.24	0.0956
fig|273123.14.peg.4346	yptb2507	csy2	CRISPR-associated protein, Csy2 family		2.34	1.14	2.63	0.919	2.23	-0.108
fig|273123.14.peg.4344	yptb2509	cas3f	CRISPR-associated helicase Cas3		2.3	2.81	2.53	1.17	1.93	-0.39
fig|273123.14.peg.4347	yptb2506	csy3	CRISPR-associated protein, Csy3 family		2.28	0.339	2.39	0.143	1.56	-0.214
fig|273123.14.peg.3598	yptb3182	gcvT	Aminomethyltransferase (glycine cleavage system T protein) (EC 2.1.2.10)	Glycine, serine and threonine metabolism; One carbon pool by folate; Nitrogen metabolism	2.28	-0.0763	-0.015	-0.451	0.599	0.532
fig|273123.14.peg.2093	yptb0592	yfiN	Inner membrane protein YfiN		2.21	2.28	2.45	2.3	1.46	1.33
fig|273123.14.peg.4343		cas1	CRISPR-associated protein Cas1		1.95	3.17	1.95	0.876	1.56	-0.554
fig|273123.14.peg.1048	yptb1527	cdd	Cytidine deaminase (EC 3.5.4.5)	Pyrimidine metabolism; Drug metabolism - other enzymes	1.78	1.14	3.28	1.34	2.5	2.02
fig|273123.14.peg.3515	yptb3259	yspR	Quorum-sensing transcriptional activator YspR		1.74	2.5	1.67	2.19	2.22	0.907
fig|273123.14.peg.2105			Na+ dependent nucleoside transporter NupC		1.73	2.28	1.45	0.335	1.71	1.14
fig|273123.14.peg.822			putative membrane protein		1.73	2.39	0.065	1.91	-2.61	-0.814
fig|273123.14.peg.333			hypothetical protein		1.61	1.58	1.9	2.38	1.81	1.33
fig|273123.14.peg.4086	yptb2743		Predicted dye-decolorizing peroxidase (DyP), YfeX-like subgroup		1.37	-0.0109	2.2	1.13	1.18	1.04
fig|273123.14.peg.2246		cpdB	2',3'-cyclic-nucleotide 2'-phosphodiesterase (EC 3.1.4.16) / 3'-nucleotidase (EC 3.1.3.6)	Purine metabolism; Pyrimidine metabolism	1.37	1.61	1.25	0.818	2.43	0.577
fig|273123.14.peg.1053; fig|273123.14.peg.1052	yptb1523; yptb1524	mglA; mglC	Galactose/methyl galactoside ABC transport system		1.33	3.25	-0.703	1.66	0.732	-0.124
fig|273123.14.peg.885			hypothetical protein		1.32	1.43	2.09	1.07	-0.619	-0.175
fig|273123.14.peg.2566			hypothetical protein		1.07	2.6	2.78	2.99	1.05	-0.38
fig|273123.14.peg.1718	yptb0926	acpH	Acyl carrier protein phosphodiesterase (EC 3.1.4.14)	Pantothenate and CoA biosynthesis	1.06	1.47	1.65	2.39	1.85	1.01
fig|273123.14.peg.1629; fig|273123.14.peg.1627	yptb1012; yptb1014	wbyL; wzz	Glycosyl transferase, family 2; O-antigen chain length determinant protein WzzB		1.05	1.3	2.17	2.56	1.7	1.77
fig|273123.14.peg.3834			Membrane-bound lytic murein transglycosylase D	Ascorbate and aldarate metabolism; Ubiquinone and other terpenoid-quinone biosynthesis; Glycosaminoglycan degradation	1.01	2.94	1.42	1.94	0.562	0.154
fig|273123.14.peg.3022	yptb3706	tusB	tRNA 5-methylaminomethyl-2-thiouridine synthase subunit TusB		0.739	2.48	1.78	1.92	1.68	0.954
fig|273123.14.peg.2699			hypothetical protein		0.655	1.03	1.81	2.92	1.58	0.0532
fig|273123.14.peg.3454			putative membrane protein		0.578	1.59	1.53	2.94	0.885	-0.347
fig|273123.14.peg.1417	yptb1200		putative membrane protein		0.474	1.47	0.954	2.18	0.343	-0.632
fig|273123.14.peg.1423; fig|273123.14.peg.1422; fig|273123.14.peg.1421	yptb1195; yptb1196; yptb1197	betA; betB; betI	Choline dehydrogenase; Betaine aldehyde dehydrogenase; Transcriptional regulator BetI	Glycine, serine and threonine metabolism; NA	0.454	3.49	2.7	5.57	2.22	-0.85
fig|273123.14.peg.908			hypothetical protein		0.346	2.48	1.64	2.15	0.957	-0.402
fig|273123.14.peg.2567	yptb0147		hypothetical protein		0.215	0.965	1.18	2.96	1.7	0.589
fig|273123.14.peg.892	yptb1661		Copper resistance protein CopD		0.202	2.13	1.05	1.84	1.69	0.791
fig|273123.14.peg.4125	yptb2706	nupC	Na+ dependent nucleoside transporter NupC		0.186	1.9	2.44	0.675	1.26	0.68
fig|273123.14.peg.2455			hypothetical protein		0.171	1.61	2.2	0.143	0.588	0.538
fig|273123.14.peg.1620			hypothetical protein		0.141	0.291	0.248	2.17	0.0699	-0.497
fig|273123.14.peg.2456	yptb0250	udp	Uridine phosphorylase (EC 2.4.2.3)	Pyrimidine metabolism; Drug metabolism - other enzymes	0.121	0.65	2.16	-2.04	1.61	1.85
fig|273123.14.peg.1755			hypothetical protein		0.12	0.615	2.06	3.36	1.58	-0.18
fig|273123.14.peg.2697			hypothetical protein		0.111	0.394	0.9	2.87	1.31	0.467
fig|273123.14.peg.811			Inner membrane protein YdgC		0.0579	1.15	1.25	3.19	1.35	0.597
fig|273123.14.peg.2104; fig|273123.14.peg.2103; fig|273123.14.peg.2102	yptb0581; yptb0582; yptb0583	deoC2; deoA; deoB	Deoxyribose-phosphate aldolase; Thymidine phosphorylase; Phosphopentomutase	Pentose phosphate pathway; Pyrimidine metabolism; Drug metabolism - other enzymes; Pentose phosphate pathway; Purine metabolism	0.0424	1.84	2.23	0.117	0.668	1.24
fig|273123.14.peg.2487	yptb0218		Uncharacterized protein YhhM		0.013	2.37	0.0782	1.81	0.865	-0.0706
fig|273123.14.peg.3808	yptb2994	skp/ompH	Periplasmic chaperone of outer membrane proteins Skp @ Outer membrane protein H precursor		0.00744	-0.302	0.436	1.54	1.6	2.1
fig|273123.14.peg.4066			hypothetical protein		-0.148	0.142	0.601	2.46	0.841	0.214
fig|273123.14.peg.2488	yptb0217		hypothetical protein		-0.167	2.02	0.302	2.24	1.18	0.7
fig|273123.14.peg.2974			hypothetical protein		-0.167	-0.349	0.633	2.3	1.45	-0.183
fig|273123.14.peg.1000	yptb1571		UPF0265 protein YeeX		-0.309	-0.441	0.212	1.3	2.03	2.07
fig|273123.14.peg.2889		dmpI	4-oxalocrotonate tautomerase		-0.324	0.395	1.2	2.08	0.129	0.168
fig|273123.14.peg.1730			hypothetical protein		-0.634	-0.0832	0.0876	2.25	1.35	0.195
fig|273123.14.peg.1420	yptb1198	betT	High-affinity choline uptake protein BetT		-0.744	1.58	1.48	3.51	1.45	-1.06
fig|273123.14.peg.2344	yptb0357	terE	Tellurium resistance protein TerD		-0.879	-1.38	-0.184	0.0525	1.17	2.06
fig|273123.14.peg.4150; fig|273123.14.peg.4149	yptb2682; yptb2683	sfuA; sfuB	Ferric iron ABC transporter		-0.909	0.0743	1.08	2.46	0.64	-0.272
fig|273123.14.peg.2884			hypothetical protein		-0.954	2.35	-0.478	1.53	-0.553	-0.355
fig|273123.14.peg.4434			hypothetical protein		-1.08	0.562	-0.699	2.07	1.16	0.833
fig|273123.14.peg.93			hypothetical protein		-1.1	0.481	1.38	3.73	1.02	-0.178
fig|273123.14.peg.2956	yptb3768	feoB	Ferrous iron transport protein B		-1.6	-1.13	-1.04	2.12	-0.471	-0.0752
fig|273123.14.peg.1419			hypothetical protein		-1.71	1.66	0.62	3.28	1.99	0.631
fig|273123.14.peg.1523			hypothetical protein		-2.36	1.17	0.399	3.85	0.208	0.0523

## Sheet: Subcluster C
PATRIC id	KEGG id	Gene	Product	Pathway	I (logFC)	II (logFC)	III (logFC)	IV (logFC)	V (logFC)	VI (logFC)
fig|273123.14.peg.4	yptb2446		hypothetical protein		2.58	2.53	2.2	2.77	1.4	0.779
fig|273123.14.peg.3755	yptb3045	lysA	Diaminopimelate decarboxylase (EC 4.1.1.20)	Lysine biosynthesis	1.99	3.41	-1.02	1.59	0.228	1.15
fig|273123.14.peg.422			hypothetical protein		1.77	2.72	2.92	4.15	2.27	1.81
fig|273123.14.peg.358			hypothetical protein		1.67	2.24	1.5	3.75	0.228	0.592
fig|273123.14.peg.1371	yptb1243		Uncharacterized inner membrane transporter YedA		1.66	2.88	1.77	1.95	-0.172	0.117
fig|273123.14.peg.64			hypothetical protein		1.61	2.29	1.35	1.6	0.707	0.288
fig|273123.14.peg.3141		lpxL	Lipid A biosynthesis palmitoleoyltransferase (EC 2.3.1.242)		1.58	2.77	2.26	2.72	1.53	1.12
fig|273123.14.peg.4335	yptb2517		Multiple sugar ABC transporter, membrane-spanning permease protein MsmF		1.5	3.32	0.831	-0.297	-0.722	-0.752
fig|273123.14.peg.1503	yptb1122		Outer membrane porin for chitooligosaccharides ChiP		1.37	2.21	0.849	0.333	0.25	-0.665
fig|273123.14.peg.645	yptb1875		Putative prophage integrase		1	2.11	1.42	1.39	0.535	-0.442
fig|273123.14.peg.1319	yptb1289		Phosphosugar-binding transcriptional regulator, RpiR family		0.77	2.37	1.32	2.98	0.944	0.853
fig|273123.14.peg.1862			hypothetical protein		0.622	0.624	0.607	1.61	1.39	2.21
fig|273123.14.peg.1068			hypothetical protein		0.52	1.24	0.608	2.36	0.604	0.29
fig|273123.14.peg.4080	yptb2747		putative membrane protein		0.446	1.9	2.05	0.163	-0.296	0.268
fig|273123.14.peg.3499			hypothetical protein		0.158	2.11	1.19	1.53	0.351	-0.138
fig|273123.14.peg.3121	yptb3614		hypothetical protein		-0.0485	0.962	0.633	2.37	-0.218	-0.412
fig|273123.14.peg.442			hypothetical protein		-0.277	2.77	1.68	2.73	0.778	-0.301

## Sheet: Subcluster D
PATRIC id	KEGG id	Gene	Product	Pathway	I (logFC)	II (logFC)	III (logFC)	IV (logFC)	V (logFC)	VI (logFC)
fig|273123.14.peg.852	yptb1697	fliL	Flagellar basal body-associated protein FliL		5.49	5.42	4.54	1.86	-0.0107	-0.805
fig|273123.14.peg.871	yptb1680	flgJ	Flagellar protein FlgJ [peptidoglycan hydrolase]		5.15	4.89	4.42	1.39	0.182	-0.39
fig|273123.14.peg.832			hypothetical protein		5.12	4.81	3.99	1.39	-0.172	-1.27
fig|273123.14.peg.4093	yptb2736	nanT	Sialic acid transporter (permease) NanT		4.85	4.3	-0.927	-0.321	0.0352	-0.562
fig|273123.14.peg.4090	yptb2739	nanK	N-acetylmannosamine kinase (EC 2.7.1.60)	Amino sugar and nucleotide sugar metabolism	4.81	3.77	-2.62	-0.727	-0.448	0.00709
fig|273123.14.peg.872			Flagellar P-ring protein FlgI		4.54	4.44	4.17	1.42	-0.0454	-0.499
fig|273123.14.peg.259; fig|273123.14.peg.258; fig|273123.14.peg.257	yptb2212; yptb2213; yptb2214		Putative virulence factor		4.36	4.09	3.12	0.93	-0.127	-0.588
fig|273123.14.peg.3701	yptb3095	lamB2	Maltoporin (maltose/maltodextrin high-affinity receptor, phage lambda receptor protein)		4.32	2.31	1.47	0.811	0.347	-0.63
fig|273123.14.peg.873			Flagellar P-ring protein FlgI		3.95	4.47	3.55	0.234	0.147	-1.06
fig|273123.14.peg.870			hypothetical protein		3.94	3.2	3.64	2.22	-0.113	-0.78
fig|273123.14.peg.831	yptb1716	fliZ	Regulator of sigma S factor FliZ		3.81	3.86	2.92	1.25	-0.624	-1.23
fig|273123.14.peg.851			hypothetical protein		3.77	2.81	2.42	1.22	-0.637	-0.744
fig|273123.14.peg.3698; fig|273123.14.peg.3697; fig|273123.14.peg.3696	yptb3098; yptb3099; yptb3100		Arabinogalactan endo-1,4-beta-galactanase (EC 3.2.1.89); Maltodextrin ABC transporter, permease protein MdxG; Maltodextrin ABC transporter, permease protein MdxF		3.38	1.88	1.01	0.511	0.939	-0.361
fig|273123.14.peg.4057	yptb2766		hypothetical protein		3.33	3.34	4.07	3.97	1.9	0.812
fig|273123.14.peg.1245			hypothetical protein		3.29	4.17	2.61	5.08	-0.0864	-0.486
fig|273123.14.peg.3843; fig|273123.14.peg.3842; fig|273123.14.peg.3841	yptb2959; yptb2960; yptb2961	proV; proW; proX	Glycine betaine/L-proline transport ATP-binding protein ProV (TC 3.A.1.12.1); Glycine betaine/L-proline transport system permease protein ProW (TC 3.A.1.12.1); Glycine betaine/L-proline transport substrate-binding protein ProX (TC 3.A.1.12.1)		3.27	4.33	2.18	2.85	0.638	0.991
fig|273123.14.peg.386			hypothetical protein		3.15	3.54	4.02	3.69	2.35	0.38
fig|273123.14.peg.1246	yptb1352	sdaC	Serine transporter		2.96	2.98	1.64	1.58	-0.181	-0.567
fig|273123.14.peg.1247			hypothetical protein		2.93	3.87	2.88	3.46	0.723	-0.762
fig|273123.14.peg.1615; fig|273123.14.peg.1614	yptb1024; yptb1025	ybbJ; qmcA	Putative activity regulator of membrane protease YbbK; Protein QmcA (possibly involved in integral membrane quality control)		2.8	1.8	1.72	1.31	2.03	1.14
fig|273123.14.peg.1505	yptb1120	nagE	PTS system, N-acetylglucosamine-specific IIC component / PTS system, N-acetylglucosamine-specific IIB component (EC 2.7.1.193) / PTS system, N-acetylglucosamine-specific IIA component (EC 2.7.1.193)		2.8	1.16	1.01	0.186	-0.756	-0.862
fig|273123.14.peg.3508; fig|273123.14.peg.3507	yptb3266; yptb3267	iucD; iutA	L-lysine 6-monooxygenase [NADPH] (EC 1.14.13.59), aerobactin biosynthesis protein IucD @ Siderophore biosynthesis protein, monooxygenase; Aerobactin siderophore receptor IutA @ TonB-dependent siderophore receptor	Lysine degradation; NA	2.59	3.37	3.44	3	0.545	0.145
fig|273123.14.peg.1192	yptb1396	aat	Leucyl/phenylalanyl-tRNA--protein transferase (EC 2.3.2.6)		2.56	3.16	2.31	2.95	1.14	1.49
fig|273123.14.peg.2992	yptb3735		N,N'-diacetylchitobiose-specific 6-phospho-beta-glucosidase (EC 3.2.1.86)	Glycolysis / Gluconeogenesis	2.56	1.38	0.965	1.21	1.37	0.421
fig|273123.14.peg.1244			hypothetical protein		2.55	3.36	2.61	6.51	1.17	-0.205
fig|273123.14.peg.4213			Uncharacterized protein YgeA of aspartate/glutamate/hydantoin racemase family		2.54	2.07	2.47	2.03	1.35	1.31
fig|273123.14.peg.1401	yptb1215		hypothetical protein		2.45	2.75	1.42	1.17	-0.138	-0.139
fig|273123.14.peg.1870			Prephenate dehydratase (EC 4.2.1.51) @ Arogenate dehydratase (EC 4.2.1.91)	Phenylalanine, tyrosine and tryptophan biosynthesis	2.42	1.37	1.74	0.0844	0.501	0.231
fig|273123.14.peg.1870			Prephenate dehydratase (EC 4.2.1.51) @ Arogenate dehydratase (EC 4.2.1.91)	Phenylalanine, tyrosine and tryptophan biosynthesis	2.42	1.37	1.74	0.0844	0.501	0.231
fig|273123.14.peg.3693	yptb3102		Maltose/maltodextrin transport ATP-binding protein MalK (EC 3.6.3.19)		2.33	0.643	-0.418	-0.00591	0.149	-0.495
fig|273123.14.peg.3837	yptb2965	rnhA	Ribonuclease HI (EC 3.1.26.4)		2.27	2.43	1.94	2.88	1.24	1.05
fig|273123.14.peg.2230			hypothetical protein		2.18	2.1	1.85	2.53	2.22	0.0615
fig|273123.14.peg.2909	yptb3810	pitA	Low-affinity inorganic phosphate transporter		2.17	2.81	1.83	2.22	1.01	0.384
fig|273123.14.peg.252	yptb2219		hypothetical protein		2.13	2.37	2.47	1.35	-0.22	-0.532
fig|273123.14.peg.3326			hypothetical protein		2.08	2.83	0.337	1.16	0.499	-0.303
fig|273123.14.peg.2674	yptb0046		UPF0758 protein YicR		1.92	2.45	1.78	3.59	2.9	2.27
fig|273123.14.peg.3929	yptb2884		Uncharacterized HTH-type transcriptional regulator YfhH		1.92	2.33	2.04	2.07	1.07	0.0942
fig|273123.14.peg.434	yptb2058	rnd	Ribonuclease D (EC 3.1.26.3)		1.89	3.14	1.51	2.39	0.528	0.735
fig|273123.14.peg.1739	yptb0908	yafE	SAM-dependent methyltransferase YafE (UbiE paralog)		1.78	2.71	0.365	1.2	0.0286	-0.427
fig|273123.14.peg.1175	yptb1410		Ribosomal protein S12p methylthiotransferase accessory factor YcaO		1.76	2.64	2.42	3.73	0.912	0.599
fig|273123.14.peg.2759			hypothetical protein		1.74	2.9	1.92	2.39	1.34	0.208
fig|273123.14.peg.1193	yptb1395	infA	Translation initiation factor 1		1.71	3.42	1.85	3.9	0.379	0.584
fig|273123.14.peg.3325	yptb3431		putative membrane protein		1.67	2.05	-0.318	0.926	0.809	-0.483
fig|273123.14.peg.1294	yptb1309	spr	Murein DD-endopeptidase MepS @ Murein LD-carboxypeptidase (EC 3.4.17.13)		1.66	2.38	0.657	0.982	-0.365	-0.823
fig|273123.14.peg.3516	yptb3258	yspI	N-3-oxooctanoyl-L-homoserine lactone synthase @ N-3-oxohexanoyl-L-homoserine lactone synthase		1.63	2.07	1.78	2.42	2.42	1.5
fig|273123.14.peg.420	yptb2071	nhaB	Na+/H+ antiporter NhaB		1.59	2.32	1.46	2.19	0.836	0.288
fig|273123.14.peg.4365			hypothetical protein		1.59	2.08	1.53	1.74	0.723	-0.126
fig|273123.14.peg.2748	yptb3954		6-phosphogluconate phosphatase		1.52	0.798	1.06	2.21	2.05	0.585
fig|273123.14.peg.261			hypothetical protein		1.46	1.88	1.48	3.06	1.18	0.161
fig|273123.14.peg.2543	yptb0167	rho	Transcription termination factor Rho		1.44	2.34	1.5	1.52	0.866	1.86
fig|273123.14.peg.2727	yptb3974	atpI	ATP synthase protein I		1.39	2.34	0.898	2	-0.344	0.0354
fig|273123.14.peg.4186	yptb2650		Putative exported protein precursor		1.34	1.67	2.23	1.74	0.858	0.279
fig|273123.14.peg.343			hypothetical protein		1.33	2.13	2.01	3.08	1.36	1.4
fig|273123.14.peg.1740			hypothetical protein		1.32	2.34	0.343	1.7	0.773	-0.346
fig|273123.14.peg.1823			hypothetical protein		1.3	1.58	1.75	1.72	1.94	2.2
fig|273123.14.peg.4237			hypothetical protein		1.28	1.43	1.14	2.38	1.1	1.21
fig|273123.14.peg.3783	yptb3017	gcvA	Glycine cleavage system transcriptional activator GcvA		1.27	2.36	0.957	2.16	0.233	0.105
fig|273123.14.peg.2976	yptb3750	aroK	Shikimate kinase I (EC 2.7.1.71)	Phenylalanine, tyrosine and tryptophan biosynthesis	1.24	2.6	1.05	1.98	0.354	0.33
fig|273123.14.peg.1577			hypothetical protein		1.24	2.11	2.26	1.75	0.482	-0.213
fig|273123.14.peg.1833	yptb0824	recX	Regulatory protein RecX		1.21	1.55	2.22	2.57	1.25	0.626
fig|273123.14.peg.1387	yptb1227		Uncharacterized protein YehS		1.19	2.82	1.17	3.58	-0.222	0.0703
fig|273123.14.peg.2218	yptb0473	rlmE/ftsJ/rrmJ	23S rRNA (uridine(2552)-2'-O)-methyltransferase (EC 2.1.1.166)		1.15	2.11	0.666	1.64	0.974	0.677
fig|273123.14.peg.1945	yptb0721	yacC	Predicted chaperone lipoprotein YacC, potentially involved in protein secretion		1.15	2.06	1.3	2.63	2.17	1.74
fig|273123.14.peg.4203			hypothetical protein		1.15	2.32	2.51	2.56	1.4	0.116
fig|273123.14.peg.4385		plsX	Phosphate:acyl-ACP acyltransferase PlsX (EC 2.3.1.n2)		1.08	2.09	1	1.69	0.171	0.717
fig|273123.14.peg.350			FIG00031715: Predicted metal-dependent phosphoesterases (PHP family)		1.07	1.79	1.56	2.22	1.22	1.27
fig|273123.14.peg.1941	yptb0725	yadG	Uncharacterized ABC transporter ATP-binding protein YadG		0.987	1.1	0.835	2.21	0.958	1.29
fig|273123.14.peg.2550	yptb0162	ppiC	Peptidyl-prolyl cis-trans isomerase PpiC (EC 5.2.1.8)		0.986	0.713	0.776	2.36	0.199	0.153
fig|273123.14.peg.3784	yptb3016		FIG173184: hypothetical protein		0.981	2.16	1.15	1.83	-0.127	0.348
fig|273123.14.peg.1716	yptb0928	tgt	Queuine tRNA-ribosyltransferase (EC 2.4.2.29)		0.918	2.1	1.2	1.98	-0.0561	0.229
fig|273123.14.peg.2989	yptb3738	tsgA	Selenite- and tellurite-inducible protein TsgA		0.876	2.29	3.25	0.704	-0.16	-0.406
fig|273123.14.peg.2803			Valine--pyruvate aminotransferase (EC 2.6.1.66)	Valine, leucine and isoleucine biosynthesis	0.853	2.68	0.905	2.1	0.409	-0.0438
fig|273123.14.peg.387	yptb2101	hns	DNA-binding protein H-NS		0.828	0.766	0.461	2.18	1.75	1.48
fig|273123.14.peg.1428	yptb1190	moaA	Cyclic pyranopterin phosphate synthase (MoaA) (EC 4.1.99.18)		0.752	0.97	1.13	2.34	1.06	1.21
fig|273123.14.peg.3933	yptb2880	mltF	Membrane-bound lytic murein transglycosylase F (EC 4.2.2.n1)		0.64	1.95	1.29	2.17	0.666	-0.0159
fig|273123.14.peg.4390	yptb2469	fabF	3-oxoacyl-[acyl-carrier-protein] synthase, KASII (EC 2.3.1.179)	Fatty acid biosynthesis; Biotin metabolism	0.62	2.51	0.771	1.57	0.596	0.495
fig|273123.14.peg.2549			hypothetical protein		0.386	0.932	0.423	2.19	0.584	0.517
fig|273123.14.peg.2696			hypothetical protein		0.289	2.57	1.07	4.02	1.52	0.747
fig|273123.14.peg.2219	yptb0472	yhbY	RNA-binding protein YhbY		0.276	1.37	0.46	2.5	1.25	0.506
fig|273123.14.peg.2783	yptb3925	sodA	Superoxide dismutase [Mn] (EC 1.15.1.1)		0.172	-0.426	0.736	4	1.57	0.89
fig|273123.14.peg.3851	yptb2951		hypothetical protein		0.121	1.17	0.624	2.4	1.56	1.43
fig|273123.14.peg.1497			hypothetical protein		-0.0415	1.82	1.13	2.57	0.219	-0.593
fig|273123.14.peg.2274			no significant database match found		-0.0523	2.68	1.5	3.83	0.739	0.33
fig|273123.14.peg.3512	yptb3262		Possible H+-antiporter clustered with aerobactin genes		-0.212	2.46	1.39	0.883	0.373	-0.534
fig|273123.14.peg.3018	yptb3710	fkpA	FKBP-type peptidyl-prolyl cis-trans isomerase FkpA precursor (EC 5.2.1.8)		-0.296	0.00994	-0.214	1.29	1.83	1.99
fig|273123.14.peg.3343	yptb3416	rpsU	SSU ribosomal protein S21p		-0.426	3.41	0.505	4.58	0.132	0.403
fig|273123.14.peg.153	yptb2311	sufD	Iron-sulfur cluster assembly protein SufD		-0.445	0.286	1.73	1.77	2.01	2.4
fig|273123.14.peg.337			hypothetical protein		-0.676	1.47	1.39	2.19	0.799	0.9
fig|273123.14.peg.2967			hypothetical protein		-0.877	0.427	0.0677	2.25	1.1	-0.0337
fig|273123.14.peg.819	yptb1726	efeO	Ferrous iron transport periplasmic protein EfeO, contains peptidase-M75 domain and (frequently) cupredoxin-like domain		-1.42	-0.0561	0.401	2.13	-0.706	-0.528
fig|273123.14.peg.820			Ferrous iron transport permease EfeU		-1.49	0.821	0.996	2.82	-0.495	-0.619

## Sheet: Subcluster E
PATRIC id	KEGG id	Gene	Product	Pathway	I (logFC)	II (logFC)	III (logFC)	IV (logFC)	V (logFC)	VI (logFC)
fig|273123.14.peg.3852	yptb2950	cspB	Cold shock protein of CSP family => CspB/CspG/CspI (naming convention as in E.coli)		7.24	5.94	5.23	3.64	1.34	0.877
fig|273123.14.peg.4088; fig|273123.14.peg.4087	yptb2741; yptb2742	nanE; nanA	N-acetylmannosamine-6-phosphate 2-epimerase (EC 5.1.3.9); N-acetylneuraminate lyase (EC 4.1.3.3)	Amino sugar and nucleotide sugar metabolism	6.19	4.25	-1.09	0.157	0.461	0.873
fig|273123.14.peg.4338; fig|273123.14.peg.4337	yptb2514; yptb2515		hypothetical protein; FIG01423360: glycoside hydrolase		5.13	2.54	1.97	0.361	-0.566	-0.887
fig|273123.14.peg.1272; fig|273123.14.peg.1271; fig|273123.14.peg.1270	yptb1329; yptb1330; yptb1331	fruB; fruK; fruA	PTS system, fructose-specific IIA component (EC 2.7.1.202) / Fructose-specific phosphocarrier protein HPr; 1-phosphofructokinase (EC 2.7.1.56); PTS system, inactive IIB catalytic domain / PTS system, fructose-specific IIB component (EC 2.7.1.202) / PTS system, fructose-specific IIC component	NA; Fructose and mannose metabolism	4.83	2.28	2.59	0.672	4.1	3.53
fig|273123.14.peg.3149; fig|273123.14.peg.3148; fig|273123.14.peg.3147; fig|273123.14.peg.3146; fig|273123.14.peg.3145; fig|273123.14.peg.3144	yptb3591; yptb3592; yptb3593; yptb3594; yptb3595; yptb3596	NA; fGGY; ccmA	Phosphosugar isomerase/binding protein; Putative D-ribulokinase (EC 2.7.1.47); Ribose/xylose/arabinose/galactoside ABC-type transport systems, permease component 1; ABC transporter, permease protein (cluster 2, ribose/xylose/arabinose/galactose); ABC transporter, ATP-binding protein (cluster 2, ribose/xylose/arabinose/galactose) / ABC transporter, ATP-binding protein (cluster 2, ribose/xylose/ara…	NA; Pentose and glucuronate interconversions	4.81	-0.308	0.235	0.179	1.08	0.559
fig|273123.14.peg.1273			hypothetical protein		4.64	0.409	3.01	0.654	3.21	2.04
fig|273123.14.peg.4340; fig|273123.14.peg.4339	yptb2512; yptb2513		Putative exported protein precursor		4.43	2.35	2.01	0.434	-0.208	-0.535
fig|273123.14.peg.3699	yptb3097	bgaB	beta-galactosidase (EC 3.2.1.23)	Galactose metabolism; Glycosaminoglycan degradation; Sphingolipid metabolism; Glycosphingolipid biosynthesis - ganglio series	4.16	0.502	1.6	-0.12	0.853	-0.617
fig|273123.14.peg.4091	yptb2738		Putative sugar isomerase involved in processing of exogenous sialic acid		3.86	2.7	-2.46	-0.449	-0.214	-0.106
fig|273123.14.peg.2938	yptb3782	glpD	Aerobic glycerol-3-phosphate dehydrogenase (EC 1.1.5.3)	Glycerophospholipid metabolism	3.63	-2.05	-0.488	0.0121	0.425	-0.0306
fig|273123.14.peg.3700			Phosphotransferase system EIIB, cysteine phosphorylation domain	Glycolysis / Gluconeogenesis; Fructose and mannose metabolism; Galactose metabolism; Ascorbate and aldarate metabolism; Starch and sucrose metabolism; Amino sugar and nucleotide sugar metabolism	3.33	0.501	2.35	0.417	1.06	0.0234
fig|273123.14.peg.4331	yptb2521	mtlK	Maltose maltodextrin transport ATP-binding protein malK		3.28	3.01	0.871	1.27	-0.0153	-0.676
fig|273123.14.peg.41		cspE	Cold shock protein of CSP family => CspC (naming convention as in E.coli)		3.23	5.68	5	6.65	2.93	3.18
fig|273123.14.peg.2937			hypothetical protein		3.18	-0.443	0.351	0.858	0.22	0.651
fig|273123.14.peg.2922	yptb3796		Gluconokinase (EC 2.7.1.12)	Pentose phosphate pathway	3.07	-1.83	-1.53	-0.141	-0.56	-0.593
fig|273123.14.peg.2632; fig|273123.14.peg.2631	yptb0086; yptb0087	glpK; glpF	Glycerol kinase (EC 2.7.1.30); Glycerol uptake facilitator protein	Glycerolipid metabolism; NA	3	-2.55	-2.03	0.257	1.56	0.696
fig|273123.14.peg.4242; fig|273123.14.peg.4240; fig|273123.14.peg.4239	yptb2600; yptb2601; yptb2602	ptsN1; NA	PTS system, IIA component; PTS system, IIB component; Integral membrane protein		2.89	1.1	-0.456	0.952	1.61	0.365
fig|273123.14.peg.4241			hypothetical protein		2.89	-0.0362	-0.478	1.11	1.5	-0.604
fig|273123.14.peg.961			hypothetical protein		2.83	2.74	2.46	1.05	0.711	-0.186
fig|273123.14.peg.577	yptb1933	nqrE	Na(+)-translocating NADH-quinone reductase subunit E (EC 1.6.5.8)		2.79	2.67	2.35	0.831	0.596	-0.326
fig|273123.14.peg.982			hypothetical protein		2.78	1.14	1.19	0.455	-0.226	-0.474
fig|273123.14.peg.1402	yptb1214	rhlE	ATP-dependent RNA helicase RhlE		2.73	3.96	3.28	3.11	0.138	-0.00383
fig|273123.14.peg.4278	yptb2568		D-3-phosphoglycerate dehydrogenase (EC 1.1.1.95)	Glycine, serine and threonine metabolism; Methane metabolism	2.69	0.189	0.732	0.458	0.418	-0.442
fig|273123.14.peg.3242			hypothetical protein		2.66	1.89	1.73	2.69	0.759	-0.133
fig|273123.14.peg.4401			hypothetical protein		2.6	1.2	1.42	0.595	0.586	-0.258
fig|273123.14.peg.4336	yptb2516		ABC transporter, permease protein 2 (cluster 1, maltose/g3p/polyamine/iron)		2.55	3.18	1.16	0.396	-0.612	-0.716
fig|273123.14.peg.2921	yptb3797	gntT	High-affinity gluconate transporter GntT		2.55	-0.607	-1.16	-0.654	-0.472	-0.666
fig|273123.14.peg.4216	yptb2622		Permease of the drug/metabolite transporter (DMT) superfamily		2.44	1.85	1.52	2.18	-0.272	-0.803
fig|273123.14.peg.3156	yptb3586	cspG	Cold shock protein of CSP family => CspB/CspG/CspI (naming convention as in E.coli)		2.39	2.07	1.86	2.49	2.19	1.9
fig|273123.14.peg.3960; fig|273123.14.peg.3958; fig|273123.14.peg.3957	yptb2857; yptb2859; yptb2860	iscA; iscS; iscR	Iron-sulfur cluster assembly iron binding protein IscA; Cysteine desulfurase (EC 2.8.1.7) => IscS; Iron-sulfur cluster regulator IscR	NA; Thiamine metabolism	2.33	1.82	1.78	3.44	2.9	0.154
fig|273123.14.peg.3716	yptb3082	nagA	N-acetylgalactosamine-6-phosphate deacetylase	Galactose metabolism; Amino sugar and nucleotide sugar metabolism	2.29	1.02	0.227	-0.317	-0.123	-0.565
fig|273123.14.peg.4135	yptb2696		hypothetical protein		2.27	1.78	1.85	2.71	1.4	1.02
fig|273123.14.peg.3	yptb2447	ndh	NADH dehydrogenase (EC 1.6.99.3)	Oxidative phosphorylation	2.2	0.209	1.03	-0.0625	0.866	1.38
fig|273123.14.peg.3727	yptb3072		hypothetical protein		2.19	0.315	-2.03	-1.44	-0.759	-0.532
fig|273123.14.peg.1808	yptb0847	yfiH	FIG00003370: Multicopper polyphenol oxidase		2.06	1.72	1.76	1.51	0.615	0.294
fig|273123.14.peg.1162	yptb1423	cspB	Cold shock protein of CSP family		2.06	3.51	2.24	2.18	0.786	0.18
fig|273123.14.peg.3937			Mobile element protein		2.04	-1.6	0.92	0.365	-1.98	-0.41
fig|273123.14.peg.3733			General secretion pathway protein C		1.87	3.29	3.43	0.969	-0.373	0.222
fig|273123.14.peg.903	yptb1652	dbpA	ATP-dependent 23S rRNA helicase DbpA		1.81	2.14	1.45	2.18	0.915	0.645
fig|273123.14.peg.3839			Cytosine/purine/uracil/thiamine/allantoin permease family protein		1.8	2.15	1.71	1.38	-0.431	-0.672
fig|273123.14.peg.1607	yptb1032	purE	N5-carboxyaminoimidazole ribonucleotide mutase (EC 5.4.99.18)	Purine metabolism	1.76	1.35	0.26	2.83	0.714	0.618
fig|273123.14.peg.4215	yptb2623	flk	Flagellar regulator flk		1.7	1.55	1.81	2.1	1.43	0.881
fig|273123.14.peg.383	yptb2104		UPF0056 inner membrane protein YchE		1.52	2.53	1.42	2.38	-0.19	-0.297
fig|273123.14.peg.2205	yptb0486	deaD	DEAD-box ATP-dependent RNA helicase DeaD (= CshA) (EC 3.6.4.13)		1.4	1.4	2.58	0.143	-1.22	0.0495
fig|273123.14.peg.3016	yptb3712	slyD	FKBP-type peptidyl-prolyl cis-trans isomerase SlyD (EC 5.2.1.8)		1.38	0.474	0.567	0.572	1.66	2.1
fig|273123.14.peg.1543	yptb1085		putative membrane protein		1.32	2.25	2	1.78	0.133	-0.341
fig|273123.14.peg.4308	yptb2542	ompX	Outer membrane protein X precursor		1.28	0.0562	0.955	2.31	2.56	4.1
fig|273123.14.peg.1134			putative membrane protein		1.2	1.18	0.589	2.34	0.754	-0.309
fig|273123.14.peg.423	yptb2069		Phage protein		1.16	3.1	1.42	2.49	0.25	-0.532
fig|273123.14.peg.1498	yptb1127		Uncharacterized protein YbfE		0.94	2.48	1.18	1.14	-0.177	-1
fig|273123.14.peg.779			hypothetical protein		0.925	0.309	0.797	2.26	0.164	-0.371
fig|273123.14.peg.4014			hypothetical protein		0.891	2.31	2.35	1.3	-0.259	-1.11
fig|273123.14.peg.1216	yptb1376	artQ	Arginine ABC transporter, permease protein ArtQ		0.885	2.28	0.203	2.26	0.0692	-0.472
fig|273123.14.peg.1427; fig|273123.14.peg.1426	yptb1191; yptb1192	moaC; moaD	Cyclic pyranopterin monophosphate synthase accessory protein; Molybdopterin synthase sulfur carrier subunit		0.824	1.02	0.87	2.58	1.59	1.99
fig|273123.14.peg.441; fig|273123.14.peg.440	yptb2051; yptb2052	mdtJ; mdtI	Spermidine export protein MdtJ; Spermidine export protein MdtI		0.746	2.28	1.96	2.77	0.706	0.526
fig|273123.14.peg.98	yptb2364	ydjM	Membrane-bound metal-dependent hydrolase YdjM, induced during SOS response		0.685	1.46	0.476	2.34	0.322	-0.6
fig|273123.14.peg.3166; fig|273123.14.peg.3165	yptb3576; yptb3577	dusB; fis	tRNA-dihydrouridine synthase DusB; DNA-binding protein Fis	Puromycin biosynthesis; alpha-Linolenic acid metabolism; Trinitrotoluene degradation; Biotin metabolism; Porphyrin and chlorophyll metabolism; Isoquinoline alkaloid biosynthesis; Insect hormone biosynthesis; Biosynthesis of type II polyketide products; NA	0.684	2.76	0.617	1.81	-0.0943	-0.624
fig|273123.14.peg.3888	yptb2921		putative membrane protein		0.496	2.33	0.468	1.71	0.581	-0.607
fig|273123.14.peg.3027		bfd	Bacterioferritin-associated ferredoxin		0.413	1.3	1.82	2.8	0.803	0.793
fig|273123.14.peg.2757; fig|273123.14.peg.2756	yptb3946; yptb3947	rnpA; NA	Ribonuclease P protein component (EC 3.1.26.5); Membrane protein insertion efficiency factor YidD		0.364	2.07	0.607	2.07	0.477	0.629
fig|273123.14.peg.1425		moaE	Molybdopterin synthase catalytic subunit MoaE (EC 2.8.1.12)		0.34	0.933	0.961	2.19	1.03	1.14
fig|273123.14.peg.4369			hypothetical protein		0.223	1.75	0.623	2.38	-0.422	0.0705
fig|273123.14.peg.2855	yptb3857		ABC transporter, substrate-binding protein (cluster 8, B12/iron complex)		-0.0286	1.78	1.3	2.17	1.45	1.26
fig|273123.14.peg.3850	yptb2952	yicN	putative membrane protein		-0.142	2.01	0.691	2.8	0.00852	-0.167
fig|273123.14.peg.158	yptb2306	pykF	Pyruvate kinase (EC 2.7.1.40)	Glycolysis / Gluconeogenesis; Purine metabolism; Pyruvate metabolism; Carbon fixation in photosynthetic organisms	-0.154	0.832	2.55	-0.3	-0.828	0.332
fig|273123.14.peg.2349; fig|273123.14.peg.2348; fig|273123.14.peg.2347	yptb0352; yptb0353; yptb0354	terZ; terA; terB	Tellurium resistance protein TerD; Tellurium resistance protein TerA; Tellurite resistance protein TerB		-0.395	-0.328	-0.217	0.9	1.27	2.65
fig|273123.14.peg.2360	yptb0341		Hemin uptake protein HemP		-0.628	2.27	0.999	1.58	-0.159	0.359
fig|273123.14.peg.152	yptb2312	sufC	Iron-sulfur cluster assembly ATPase protein SufC		-0.703	0.38	1.61	2.18	2.28	2.19
fig|273123.14.peg.1341			hypothetical protein		-0.781	0.0787	-0.198	2.52	-0.811	-0.802
fig|273123.14.peg.1006			hypothetical protein		-0.806	1.61	-0.837	2.41	-0.948	-0.781
fig|273123.14.peg.3381	yptb3383	exbB	TonB-ExbBD energy transducing system, ExbB subunit		-0.97	0.295	0.221	2.13	-0.026	1.24
fig|273123.14.peg.3575	yptb3203	metK	S-adenosylmethionine synthetase (EC 2.5.1.6)	Cysteine and methionine metabolism	-1.18	-0.605	-1.76	-1.02	-1.44	4.38
